# Supplementary material
Source: ML conference proceedings conference paper supplement (https://openreview.net/forum?id=3fqqjMM1BI)
Supplement: supplementary_material [file attachment]

## Sheet: Form Responses 1
Timestamp	Please input your name	Please input today's date (when you receive the intervention)	Please select one of the assessment category	Rate the target thought	I feel calm	I feel secure	I am tense	I feel strained	I feel at ease	I feel upset	I am presently worrying over possible misfortunes	I feel satisfied	I feel frightened	I feel comfortable	I feel self-confident	I feel nervous	I am jittery	I feel indecisive	I am relaxed	I feel content	I am worried	I feel confused	I feel steady	I feel pleasant	My thoughts are causing me distress or emotional pain	I am so caught up in my thoughts that I don’t know what to do	I am over-analysing the situation to the point where its’ unhelpful to me	I am struggling with my thoughts	I am upset with myself for having certain thoughts	I am very entangled in my thoughts	It’s such a struggle to let go of upsetting thoughts even though I know that letting go would be helpful	My painful experiences and memories make it difficult for me to live a life that I would value	I’m afraid of my feelings	I worry about not being able to control my worries and feelings	My painful memories prevent me from having a fulfilling life	Emotions cause problems in my life	It seems like most people are handling their lives better than I am	Worries get in the way of my success	Group	Valid	Sex	id	Neg-Pos corrected	I feel calm	I feel secure	I am tense	I feel strained	I feel at ease	I feel upset
2023-06-15 10:58:28	VR1	2023-06-15	Pre-assessment	2	1	2	4	1	2	3	4	1	2	2	1	2	3	3	2	1	3	4	2	2	7	3	4	7	6	7	7	5	1	4	6	4	6	3	VR	1	0	0		4	3	4	1	3	3
2023-06-15 11:38:57	VR1	2023-06-15	Post-assessment	4	3	2	2	3	2	2	2	2	2	3	1	3	2	2	3	1	2	3	3	2	6	5	5	5	4	5	6	3	4	5	5	5	6	3	VR	1	0	0		2	3	2	3	3	2
2023-06-16 20:18:37	VR1	2023-06-16	Pre-assessment	2	3	1	3	3	1	2	3	1	3	2	1	3	3	2	1	1	3	2	1	1	7	6	4	6	3	7	6	6	3	3	6	5	7	2	VR	0	0	0		2	4	3	3	4	2
2023-06-16 20:53:43	MI1	2023-06-16	Post-assessment	5	2	2	1	2	2	1	1	1	1	2	2	2	2	1	3	1	1	1	2	2	5	5	3	2	1	5	3	5	2	2	3	5	5	2	Mental-imagery	0	0	10		3	3	1	2	3	1
2023-06-18 01:58:23	MI2	2023-06-18	Pre-assessment	1	2	3	3	3	2	2	1	3	2	2	3	2	2	2	2	2	1	2	2	2	5	2	2	2	5	2	2	1	5	2	1	4	2	4	Mental-imagery	0	1	11		3	2	3	3	3	2
2023-06-18 22:41:02	MI1	2023-06-18	Pre-assessment	2	1	1	4	4	1	3	4	1	2	1	1	2	3	2	1	1	4	3	1	1	7	5	5	7	2	7	6	7	2	5	6	6	7	3	Mental-imagery	0	0	10		4	4	4	4	4	3
2023-06-18 23:07:33	MI1	2023-06-18	Post-assessment	4	3	3	1	2	2	2	1	2	1	3	2	1	3	1	4	2	1	1	4	2	3	2	2	4	5	3	3	5	2	3	4	5	5	2	Mental-imagery	0	0	10		2	2	1	2	3	2
2023-06-21 15:19:08	MI2	2023-06-21	Pre-assessment	1	1	1	2	2	1	2	2	2	2	1	2	3	3	2	1	1	3	2	2	1	6	3	5	6	6	5	4	5	5	5	6	6	4	6	Mental-imagery	0	1	11		4	4	2	2	4	2
2023-07-15 18:42:42	MI3	2023-07-15	Pre-assessment	2	2	2	3	3	2	3	3	2	2	1	1	3	3	4	2	2	3	3	2	2	5	5	6	5	5	5	5	5	5	5	6	5	4	6	Mental-imagery	1	0	12		3	3	3	3	3	3
2023-07-15 19:02:37	MI3	2023-07-15	Post-assessment	7	3	3	2	1	3	1	1	3	1	3	3	1	1	2	3	3	2	1	4	3	2	1	2	2	3	2	2	1	1	2	1	2	2	2	Mental-imagery	1	0	12		2	2	2	1	2	1
2023-07-24 20:49:09	MI4	2023-07-12	Pre-assessment	6	3	2	2	1	3	1	1	3	2	3	3	2	2	3	3	3	2	2	3	3	4	2	2	2	2	3	4	2	3	2	3	2	5	5	Mental-imagery	1	0	13		2	3	2	1	2	1
2023-07-24 21:04:47	MI4	2023-07-24	Post-assessment	8	3	3	1	1	3	1	1	4	2	3	3	1	2	1	4	4	1	2	4	4	2	1	2	1	1	1	1	2	1	1	1	2	2	2	Mental-imagery	1	0	13		2	2	1	1	2	1
2023-07-25 14:39:38	MI5	2023-07-25	Pre-assessment	2	3	3	2	2	2	3	3	2	3	3	3	2	2	2	2	2	3	3	2	2	2	2	1	2	3	3	2	5	3	5	5	4	3	5	Mental-imagery	1	0	14		2	2	2	2	3	3
2023-07-25 14:54:54	MI5	2023-07-25	Post-assessment	4	4	3	2	1	3	1	2	3	3	3	3	1	2	2	2	2	2	2	3	3	1	2	2	2	1	2	2	4	1	2	3	4	2	2	Mental-imagery	1	0	14		1	2	2	1	2	1
2023-07-25 21:17:50	VR1	2023-07-25	Pre-assessment	1	1	1	4	3	1	3	2	1	3	1	2	3	4	2	1	3	2	4	2	2	7	6	6	6	7	6	7	5	5	6	7	5	4	1	VR	1	0	0		4	4	4	3	4	3
2023-07-25 21:35:59	VR1	2023-07-25	Post-assessment	1	3	2	3	3	3	1	1	3	2	2	1	2	2	1	3	3	2	1	2	3	4	2	3	3	3	4	3	6	6	5	5	5	4	1	VR	1	0	0		2	3	3	3	2	1
2023-07-27 12:12:47	VR2	2023-07-27	Pre-assessment	4	3	3	2	2	3	1	2	3	2	3	3	1	2	2	3	3	2	2	3	3	2	5	3	4	2	4	3	2	2	2	2	2	2	2	VR	1	0	1		2	2	2	2	2	1
2023-07-27 12:28:07	VR2	2023-07-27	Post-assessment	3	3	3	2	2	3	1	2	3	2	3	3	2	2	2	3	3	2	1	3	3	2	2	4	3	2	3	2	3	2	2	3	2	2	2	VR	1	0	1		2	2	2	2	2	1
2023-07-28 11:16:18	VR3	2023-07-28	Pre-assessment	2	1	1	3	3	1	4	4	1	4	1	1	3	3	3	1	2	4	3	2	1	5	6	7	7	7	6	6	5	6	6	6	7	7	6	VR	1	0	2		4	4	3	3	4	4
2023-07-28 11:49:30	VR3	2023-07-28	Post-assessment	9	4	4	1	1	4	3	3	4	1	3	3	1	1	2	4	4	2	1	3	4	2	2	2	1	1	1	1	1	1	1	3	3	3	2	VR	1	0	2		1	1	1	1	1	3
2023-07-28 17:15:44	VR4	2023-07-28	Pre-assessment	2	2	2	3	3	1	3	3	1	2	2	2	2	1	1	1	2	2	1	2	1	5	4	6	5	3	4	4	5	5	5	6	5	6	6	VR	1	0	3		3	3	3	3	4	3
2023-07-28 17:32:07	VR4	2023-07-28	Post-assessment	7	3	2	2	2	3	2	2	3	1	3	3	1	1	1	2	2	2	1	3	3	4	3	4	3	5	4	3	4	3	2	4	4	3	3	VR	1	0	3		2	3	2	2	2	2
2023-07-31 15:18:39	VR5	2023-07-31	Post-assessment	3	3	3	1	2	4	2	2	3	2	3	2	1	1	1	4	2	1	2	3	3	3	3	4	4	5	3	4	4	3	3	3	4	3	4	VR	0	1	4		2	2	1	2	1	2
2023-08-01 15:01:37	VR6	2023-08-01	Pre-assessment	3	2	2	4	4	2	1	4	1	4	1	1	4	4	3	1	1	4	2	2	1	6	5	5	5	6	5	5	4	6	7	5	5	5	7	VR	1	1	5		3	3	4	4	3	1
2023-08-01 15:18:49	VR6	2023-08-01	Post-assessment	8	4	3	1	1	4	1	1	3	1	3	2	1	1	2	4	4	1	1	4	3	1	1	1	1	1	1	1	2	2	2	2	2	3	2	VR	1	1	5		1	2	1	1	1	1
2023-08-14 09:46:55	MI6	1994-04-18	Pre-assessment	3	1	1	1	4	2	4	4	2	4	1	1	4	4	2	1	1	4	3	1	1	6	6	7	7	6	5	7	5	6	6	6	5	4	5	Mental-imagery	1	1	15		4	4	1	4	3	4
2023-08-14 10:10:27	MI6	1994-04-18	Post-assessment	7	4	4	2	2	4	2	2	4	2	4	3	2	1	2	4	3	1	2	3	4	2	3	1	2	3	3	2	1	2	2	1	2	4	5	Mental-imagery	1	1	15		1	1	2	2	1	2
2023-08-15 10:44:52	MI7	2023-08-15	Pre-assessment	2	3	3	2	1	3	2	1	3	1	3	2	3	1	1	3	3	3	4	1	3	7	7	7	6	1	7	7	3	5	6	1	7	3	2	Mental-imagery	1	1	16		2	2	2	1	2	2
2023-08-15 10:59:02	MI7	2023-08-15	Post-assessment	4	3	3	1	1	3	1	1	3	1	4	3	1	1	1	3	3	1	1	3	2	1	4	6	4	1	6	7	1	2	1	1	5	2	1	Mental-imagery	1	1	16		2	2	1	1	2	1
2023-08-15 14:44:40	MI8	2023-08-15	Pre-assessment	1	1	2	1	2	1	3	3	1	4	1	3	4	3	1	1	1	4	4	1	2	7	5	7	7	5	7	6	5	6	4	2	2	2	6	Mental-imagery	1	1	17		4	3	1	2	4	3
2023-08-15 15:02:43	MI8	2023-08-15	Post-assessment	4	3	2	3	3	3	4	1	2	1	3	3	1	1	1	3	3	3	4	3	2	4	1	4	2	2	6	4	1	2	3	1	4	1	5	Mental-imagery	1	1	17		2	3	3	3	2	4
2023-08-15 16:39:14	VR7	2023-08-15	Pre-assessment	3	3	2	3	3	1	3	3	2	4	1	1	3	3	3	1	1	4	4	2	2	6	3	3	5	5	5	6	2	4	4	6	6	6	6	VR	1	1	6		2	3	3	3	4	3
2023-08-15 17:04:39	VR7	2023-08-15	Post-assessment	6	3	2	3	3	2	3	2	2	1	3	2	3	3	3	2	2	3	1	3	2	5	3	5	3	2	4	5	4	4	3	3	4	4	4	VR	1	1	6		2	3	3	3	3	3
2023-08-17 10:39:40	MI9	2023-08-17	Pre-assessment	2	2	2	3	3	3	4	2	1	3	2	1	4	2	2	2	1	4	4	2	2	6	5	6	6	5	6	6	3	3	3	4	5	5	4	Mental-imagery	1	0	18		3	3	3	3	2	4
2023-08-17 10:54:04	MI9	2023-08-17	Post-assessment	5	3	3	2	2	3	2	1	3	1	3	3	1	1	2	3	3	2	1	2	3	5	5	4	4	4	5	5	5	4	3	3	5	3	4	Mental-imagery	1	0	18		2	2	2	2	2	2
2023-08-23 12:08:29	VR8	2023-08-23	Pre-assessment	3	3	3	3	2	3	2	3	3	2	3	3	2	2	2	3	2	2	1	3	3	3	2	1	1	2	1	1	1	1	1	2	5	1	3	VR	1	0	7		2	2	3	2	2	2
2023-08-23 12:25:05	VR8	2023-08-23	Post-assessment	2	4	3	3	2	4	1	2	3	1	3	4	1	2	2	3	2	2	1	3	3	2	1	1	1	3	1	2	1	1	1	2	6	1	2	VR	1	0	7		1	2	3	2	1	1
2023-08-24 11:25:37	VR9	2023-08-24	Pre-assessment	1	1	2	3	3	1	1	1	4	1	3	1	4	3	3	1	1	3	3	1	1	6	6	6	6	6	6	7	6	6	7	6	6	7	6	VR	1	1	8		4	3	3	3	4	1
2023-08-24 11:52:21	VR9	2023-08-24	Post-assessment	7	3	4	2	2	3	2	1	3	2	3	3	2	2	2	3	3	2	2	3	3	4	4	6	4	3	3	4	4	3	3	3	3	3	3	VR	1	1	8		2	1	2	2	2	2
2023-08-25 15:46:42	VR10	2023-08-25	Pre-assessment	2	3	4	3	2	3	2	3	2	1	2	2	3	2	3	3	3	3	3	1	3	7	5	7	5	3	2	7	7	6	6	6	6	6	3	VR	1	1	9		2	1	3	2	2	2
2023-08-25 16:03:28	VR10	2023-08-25	Post-assessment	3	4	4	1	1	4	2	3	3	1	3	3	1	1	1	3	3	2	2	2	3	6	3	4	3	2	3	6	5	4	6	3	5	3	2	VR	1	1	9		1	1	1	1	1	2
2023-08-26 11:13:22	MI10	2023-08-25	Pre-assessment	6	4	4	2	1	2	2	1	1	1	2	3	1	1	4	2	3	3	4	1	3	5	6	1	7	1	2	1	1	1	1	1	1	7	7	Mental-imagery	1	1	19		1	1	2	1	3	2
2023-08-26 11:27:53	MI10	2024-08-25	Post-assessment	6	4	4	1	1	4	1	1	2	1	1	4	1	1	1	4	3	2	3	3	2	1	1	1	1	1	2	1	1	1	1	1	2	5	3	Mental-imagery	1	1	19		1	1	1	1	1	1
2023-08-27 14:51:32	MI11	2023-08-27	Pre-assessment	1	2	2	3	2	3	3	3	3	2	2	2	2	2	2	2	3	2	2	2	3	4	3	2	4	2	5	3	5	3	3	4	5	6	6	Mental-imagery	1	1	20		3	3	3	2	2	3
2023-08-27 15:09:11	MI11	2023-08-27	Post-assessment	1	3	3	2	2	3	2	3	2	2	2	3	2	2	2	2	3	2	1	2	3	3	3	2	2	2	4	3	3	2	4	2	5	5	4	Mental-imagery	1	1	20		2	2	2	2	2	2
2023-08-28 15:34:09	VR11	2023-08-28	Pre-assessment	2	2	2	3	3	2	2	3	1	2	2	2	3	2	3	2	2	4	4	2	2	5	5	2	5	2	3	6	2	3	5	3	3	2	5	VR	1	1	21		3	3	3	3	3	2
2023-08-28 15:50:51	VR11	2023-08-28	Post-assessment	5	4	3	2	2	2	2	2	3	1	2	2	3	2	2	3	2	3	3	4	3	2	4	2	2	3	4	5	3	2	5	3	3	2	5	VR	1	1	21		1	2	2	2	3	2
[truncated: 18 more columns]

## Sheet: Report
																												STAI_Sum	STAI_Sum	STAI_Sum	SCFQ_Sum	SCFQ_Sum	SCFQ_Sum	AAQ_II	AAQ_II	AAQ_II	expressiveness	expressiveness	expressiveness
	Expressiveness						AAQ_II						SCFQ_Sum						AAQ_II									mean	median	std	mean	median	std	mean	median	std	mean	median	std
	M		W		M/W		M		W		M/W		M		W		M/W		M		W		M/W			time	Group
	mean	std	mean	std	mean	std	mean	std	mean	std	mean	std	mean	std	mean	std	mean	std	mean	std	mean	std	mean	std		0	Mental-imagery	55.1	56.5	11.2689	32.7	38	11.373	28.6	28	5.60159	2.7	2	1.82878
Pre-Ex																										0	VR	57.7	59.5	11.6433	33.1	34.5	10.5562	32.2	36	11.2921	2.3	2	0.948683
VR																										1	Mental-imagery	36.8	34	7.67101	19.8	17.5	9.84096	18.4	17	6.97933	5	4.5	2.0548
Control																										1	VR	37.7	38	7.39444	19.8	22	7.88529	21.3	22.5	6.34298	5.1	5.5	2.72641
Post																										diff	Mental-imagery	-18.3			-12.9			-10.2			2.3
VR																											VR	-20			-13.3			-10.9			2.8
Control
																													STAI_Sum	STAI_Sum	STAI_Sum	SCFQ_Sum	SCFQ_Sum	SCFQ_Sum	AAQ_II	AAQ_II	AAQ_II	expressiveness	expressiveness	expressiveness
																													mean	median	std	mean	median	std	mean	median	std	mean	median	std
	Expressiveness						AAQ_II						SCFQ_Sum						AAQ_II							time	Group	Sex
	M		W		M/W		M		W		M/W		M		W		M/W		M		W		M/W			0	Mental-imagery	M	54.6	49	13.1643	35.2	42	11.1669	28.4	27	6.69328	2.6	2	2.07364
	mean	std	mean	std	mean	std	mean	std	mean	std	mean	std	mean	std	mean	std	mean	std	mean	std	mean	std	mean	std		0	Mental-imagery	W	55.6	62	10.5736	30.2	36	12.276	28.8	29	5.06952	2.8	2	1.78885
Diff																										0	VR	M	61	60	8.15475	35.4	36	5.50454	36	39	8.09321	2.2	2	0.83666
VR																										0	VR	W	54.4	55	14.5362	30.8	31	14.3944	28.4	33	13.6125	2.4	2	1.14018
Control																										1	Mental-imagery	M	36.4	32	7.4364	19	19	7.84219	17.2	17	4.71169	4.4	4	2.30217
																										1	Mental-imagery	W	37.2	36	8.75785	20.6	14	12.4419	19.6	18	9.15423	5.6	5	1.81659
																										1	VR	M	38.8	38	9.67988	22.2	27	8.81476	22.8	23	4.96991	5.8	6	1.92354
																										1	VR	W	36.6	38	5.12835	17.4	18	6.91375	19.8	16	7.75887	4.4	3	3.43511

## Sheet: Analysis
		Sex_Idx	Sex	Category_Idx	Count	Rate the target thought	I feel calm	I feel secure	I am tense	I feel strained	I feel at ease	I feel upset	I am presently worrying over possible misfortunes	I feel satisfied	I feel frightened	I feel comfortable	I feel self-confident	I feel nervous	I am jittery	I feel indecisive	I am relaxed	I feel content	I am worried	I feel confused	I feel steady	I feel pleasant	My thoughts are causing me distress or emotional pain	I am so caught up in my thoughts that I don’t know what to do	I am over-analysing the situation to the point where its’ unhelpful to me	I am struggling with my thoughts	I am upset with myself for having certain thoughts	I am very entangled in my thoughts	It’s such a struggle to let go of upsetting thoughts even though I know that letting go would be helpful	My painful experiences and memories make it difficult for me to live a life that I would value	I’m afraid of my feelings	I worry about not being able to control my worries and feelings	My painful memories prevent me from having a fulfilling life	Emotions cause problems in my life	It seems like most people are handling their lives better than I am	Worries get in the way of my success	STAI-Sum	SCFQ-Sum	AAQ-II
Mental-imagery	Pre-assessment	0	M	Mental-imagery-Pre-assessment-M	4	3	2.5	2.25	2.5	2.25	2.5	2.75	2.25	2	2.5	2.25	2	2.75	2.25	2.75	2.25	2	3	3	2.25	2.25	4.25	3.5	3.75	3.75	3.75	4.25	4.25	3.75	3.5	3.75	4.5	4	4.25	5	53.75	27.5	28.75
Mental-imagery	Pre-assessment	1	W	Mental-imagery-Pre-assessment-W	5	2.6	2.2	2.4	1.8	2	2.2	2.8	2.4	2	2.4	1.8	2.2	2.8	2.2	2	1.8	2.2	3.2	3.4	1.2	2.4	5.8	5.4	4.8	6.2	3	5.2	4.8	3.8	4.2	4	2.8	4	4.4	5.2	54.6	35.2	28.4
Mental-imagery	Post-assessment	0	M	Mental-imagery-Post-assessment-M	4	6	3.25	3	1.75	1.25	3	1.25	1.25	3.25	1.75	3	3	1	1.5	1.75	3	3	1.75	1.5	3.25	3.25	2.5	2.25	2.5	2.25	2.25	2.5	2.5	3	1.75	2	2	3.25	2.25	2.5	33.75	16.75	16.75
Mental-imagery	Post-assessment	1	W	Mental-imagery-Post-assessment-W	5	4.4	3.4	3.2	1.8	1.8	3.4	2	1.6	2.6	1.4	2.8	3.2	1.4	1.2	1.4	3.2	3	1.8	2.2	2.8	2.6	2.2	2.4	2.8	2.2	1.8	4.2	3.4	1.4	1.8	2.2	1.2	3.6	3.4	3.6	36.4	19	17.2
VR	Pre-assessment	0	M	VR-Pre-assessment-M	6	2.33333	1.83333	2	3.16667	2.33333	1.83333	2.66667	3	1.66667	2.5	2	2	2.16667	2.5	2.16667	1.83333	2.16667	2.5	2.5	2.33333	2	4.83333	4.33333	4.5	5	4.5	4.66667	4.66667	3.83333	3.33333	4	4.83333	4.66667	4.33333	3.5	55.8333	32.5	28.5
VR	Pre-assessment	1	W	VR-Pre-assessment-W	5	2.2	2.2	2.4	3.2	3	1.8	1.8	2.8	2	2.4	1.8	1.4	3.4	2.8	3	1.6	1.6	3.6	3.2	1.6	1.8	6	4.8	4.6	5.2	4.4	4.2	6.2	4.2	5	5.8	5.2	5.2	5.2	5.4	61	35.4	36
VR	Post-assessment	0	M	VR-Post-assessment-M	6	4.33333	3.33333	2.66667	2.16667	2.16667	3.16667	1.66667	2	3	1.5	2.83333	2.5	1.66667	1.66667	1.66667	3	2.5	2	1.33333	2.83333	3	3.33333	2.5	3.16667	2.66667	3	3	2.83333	3	2.83333	2.66667	3.66667	4.16667	3.16667	2.16667	39	20.5	21.6667
VR	Post-assessment	1	W	VR-Post-assessment-W	5	5.8	3.6	3.2	1.8	1.8	3	2	1.8	2.8	1.2	2.8	2.4	2	1.8	2	3	2.8	2.2	1.8	3.2	2.8	3.6	3	3.6	2.6	2.2	3	4.2	3.6	3	3.8	2.8	3.4	3	3.2	38.8	22.2	22.8
Mental-imagery	Diff (Post-Pre)	0	M	Mental-imagery-Diff (Post-Pre)-M	8	3	0.75	0.75	-0.75	-1	0.5	-1.5	-1	1.25	-0.75	0.75	1	-1.75	-0.75	-1	0.75	1	-1.25	-1.5	1	1	-1.75	-1.25	-1.25	-1.5	-1.5	-1.75	-1.75	-0.75	-1.75	-1.75	-2.5	-0.75	-2	-2.5	-20	-10.75	-12
Mental-imagery	Diff (Post-Pre)	1	W	Mental-imagery-Diff (Post-Pre)-W	10	1.8	1.2	0.8	0	-0.2	1.2	-0.8	-0.8	0.6	-1	1	1	-1.4	-1	-0.6	1.4	0.8	-1.4	-1.2	1.6	0.2	-3.6	-3	-2	-4	-1.2	-1	-1.4	-2.4	-2.4	-1.8	-1.6	-0.4	-1	-1.6	-18.2	-16.2	-11.2
VR	Diff (Post-Pre)	0	M	VR-Diff (Post-Pre)-M	12	2	1.5	0.666667	-1	-0.166667	1.33333	-1	-1	1.33333	-1	0.833333	0.5	-0.5	-0.833333	-0.5	1.16667	0.333333	-0.5	-1.16667	0.5	1	-1.5	-1.83333	-1.33333	-2.33333	-1.5	-1.66667	-1.83333	-0.833333	-0.5	-1.33333	-1.16667	-0.5	-1.16667	-1.33333	-16.8333	-12	-6.83333
VR	Diff (Post-Pre)	1	W	VR-Diff (Post-Pre)-W	10	3.6	1.4	0.8	-1.4	-1.2	1.2	0.2	-1	0.8	-1.2	1	1	-1.4	-1	-1	1.4	1.2	-1.4	-1.4	1.6	1	-2.4	-1.8	-1	-2.6	-2.2	-1.2	-2	-0.6	-2	-2	-2.4	-1.8	-2.2	-2.2	-22.2	-13.2	-13.2
Mental-imagery	Diff (Post-Pre)		MW	Mental-imagery-Diff (Post-Pre)-MW		2.4	0.975	0.775	-0.375	-0.6	0.85	-1.15	-0.9	0.925	-0.875	0.875	1	-1.575	-0.875	-0.8	1.075	0.9	-1.325	-1.35	1.3	0.6	-2.675	-2.125	-1.625	-2.75	-1.35	-1.375	-1.575	-1.575	-2.075	-1.775	-2.05	-0.575	-1.5	-2.05	-19.1	-13.475	-11.6
VR	Diff (Post-Pre)		MW	VR-Diff (Post-Pre)-MW		2.8	1.45	0.733333	-1.2	-0.683333	1.26667	-0.4	-1	1.06667	-1.1	0.916667	0.75	-0.95	-0.916667	-0.75	1.28333	0.766667	-0.95	-1.28333	1.05	1	-1.95	-1.81667	-1.16667	-2.46667	-1.85	-1.43333	-1.91667	-0.716667	-1.25	-1.66667	-1.78333	-1.15	-1.68333	-1.76667	-19.5167	-12.6	-10.0167
Overall	Diff (Post-Pre)		MW	Overall-Diff (Post-Pre)-MW		0.4	0.475	-0.0416667	-0.825	-0.0833333	0.416667	0.75	-0.1	0.141667	-0.225	0.0416667	-0.25	0.625	-0.0416667	0.05	0.208333	-0.133333	0.375	0.0666667	-0.25	0.4	0.725	0.308333	0.458333	0.283333	-0.5	-0.0583333	-0.341667	0.858333	0.825	0.108333	0.266667	-0.575	-0.183333	0.283333	-0.416667	0.875	1.58333

## Sheet: Master Participants
Name	Device	Sex	Id
VR1	VR	0	0
VR2	VR	0	1
VR3	VR	0	2
VR4	VR	0	3
VR5	VR	1	4	remove
VR6	VR	1	5
VR7	VR	1	6
VR8	VR	0	7
VR9	VR	1	8
VR10	VR	1	9
MI1	Mental-imagery	0	10
MI2	Mental-imagery	1	11	remove
MI3	Mental-imagery	0	12
MI4	Mental-imagery	0	13
MI5	Mental-imagery	0	14
MI6	Mental-imagery	1	15
MI7	Mental-imagery	1	16
MI8	Mental-imagery	1	17
MI9	Mental-imagery	0	18
MI10	Mental-imagery	1	19
MI11	Mental-imagery	1	20
VR11	VR	1	21

## Sheet: Questionnaires
	STAI	Reverse?
Q1	I feel calm	1
Q2	I feel secure	1
Q3	I am tense	0
Q4	I feel strained	0
Q5	I feel at ease	1
Q6	I feel upset	0
Q7	I am presently worrying over possible misfortunes	0
Q8	I feel satisfied	1
Q9	I feel frightened	0
Q10	I feel comfortable	1
Q11	I feel self-confident	1
Q12	I feel nervous	0
Q13	I am jittery	0
Q14	I feel indecisive	0
Q15	I am relaxed	1
Q16	I feel content	1
Q17	I am worried	0
Q18	I feel confused	0
Q19	I feel steady	1
Q20	I feel pleasant	1
	SCFQ
Q1	Q1
Q2	I am so caught up in my thoughts that I don’t know what to do
Q3	I am so caught up in my thoughts that I don’t know what to do
Q4	I am struggling with my thoughts
Q5	I am upset with myself for having certain thoughts
Q6	I am very entangled in my thoughts
Q7	It’s such a struggle to let go of upsetting thoughts even though I know that letting go would be helpful
	The Acceptance and Action Questionnaire-II (AAQ-II)
Q1	My painful experiences and memories make it difficult for me to live a life that I would value
Q2	I’m afraid of my feelings
Q3	I worry about not being able to control my worries and feelings
Q4	My painful memories prevent me from having a fulfilling life
Q5	Emotions cause problems in my life
Q6	It seems like most people are handling their lives better than I am
Q7	Worries get in the way of my success

## Sheet: Analytis - PosNeg
Emotion	Positive or Not	Mental-imagery-Diff (Post-Pre)-MW	Effect | Mental-imagery-Diff (Post-Pre)-MW	VR-Diff (Post-Pre)-MW	Effect | VR-Diff (Post-Pre)-MW	Overall-Diff (Post-Pre)-MW	Overall-Diff (Post-Pre)-MW
I feel calm	1	0.975	0.975	1.45	1.45	0.475	0.475
I feel secure	1	0.775	0.775	0.733333	0.733333	-0.0416667	-0.0416667
I am tense	0	-0.375	0.375	-1.2	1.2	-0.825	0.825
I feel strained	0	-0.6	0.6	-0.683333	0.683333	-0.0833333	0.0833333
I feel at ease	1	0.85	0.85	1.26667	1.26667	0.416667	0.416667
I feel upset	0	-1.15	1.15	-0.4	0.4	0.75	-0.75
I am presently worrying over possible misfortunes	0	-0.9	0.9	-1	1	-0.1	0.1
I feel satisfied	1	0.925	0.925	1.06667	1.06667	0.141667	0.141667
I feel frightened	0	-0.875	0.875	-1.1	1.1	-0.225	0.225
I feel comfortable	1	0.875	0.875	0.916667	0.916667	0.0416667	0.0416667
I feel self-confident	1	1	1	0.75	0.75	-0.25	-0.25
I feel nervous	0	-1.575	1.575	-0.95	0.95	0.625	-0.625
I am jittery	0	-0.875	0.875	-0.916667	0.916667	-0.0416667	0.0416667
I feel indecisive	0	-0.8	0.8	-0.75	0.75	0.05	-0.05
I am relaxed	1	1.075	1.075	1.28333	1.28333	0.208333	0.208333
I feel content	1	0.9	0.9	0.766667	0.766667	-0.133333	-0.133333
I am worried	0	-1.325	1.325	-0.95	0.95	0.375	-0.375
I feel confused	0	-1.35	1.35	-1.28333	1.28333	0.0666667	-0.0666667		\
I feel steady	1	1.3	1.3	1.05	1.05	-0.25	-0.25
I feel pleasant	1	0.6	0.6	1	1	0.4	0.4
My thoughts are causing me distress or emotional pain	0	-2.675	2.675	-1.95	1.95	0.725	-0.725
I am so caught up in my thoughts that I don’t know what to do	0	-2.125	2.125	-1.81667	1.81667	0.308333	-0.308333
I am over-analysing the situation to the point where its’ unhelpful to me	0	-1.625	1.625	-1.16667	1.16667	0.458333	-0.458333
I am struggling with my thoughts	0	-2.75	2.75	-2.46667	2.46667	0.283333	-0.283333
I am upset with myself for having certain thoughts	0	-1.35	1.35	-1.85	1.85	-0.5	0.5
I am very entangled in my thoughts	0	-1.375	1.375	-1.43333	1.43333	-0.0583333	0.0583333
It’s such a struggle to let go of upsetting thoughts even though I know that letting go would be helpful	0	-1.575	1.575	-1.91667	1.91667	-0.341667	0.341667
My painful experiences and memories make it difficult for me to live a life that I would value	0	-1.575	1.575	-0.716667	0.716667	0.858333	-0.858333
I’m afraid of my feelings	0	-2.075	2.075	-1.25	1.25	0.825	-0.825
I worry about not being able to control my worries and feelings	0	-1.775	1.775	-1.66667	1.66667	0.108333	-0.108333
My painful memories prevent me from having a fulfilling life	0	-2.05	2.05	-1.78333	1.78333	0.266667	-0.266667
Emotions cause problems in my life	0	-0.575	0.575	-1.15	1.15	-0.575	0.575
It seems like most people are handling their lives better than I am	0	-1.5	1.5	-1.68333	1.68333	-0.183333	0.183333
Worries get in the way of my success	0	-2.05	2.05	-1.76667	1.76667	0.283333	-0.283333
