# Supplementary material
Source: ML conference proceedings conference paper supplement (https://openreview.net/forum?id=3fqqjMM1BI)
Supplement: supplementary_material [file Desgin_Phase_User_Feedback_anonymized.xlsx]

## Sheet: Info
Feedback Category	Description	Manifestation
Spatiality	The relation of real and virtual object regarding the distance, scale, and rotation
Physicality	Physical properties of an XR application, such as tangible artifacts or rooms
World-building	Background for the story telling
Flow-Story	The story an XR application wants to mediate
Flow-Hierarchy	The logical structure of the XR application including menus
Control	Interaction techniques with or without controllers
Locomotion	user movement and navigation in a space, includes techniques for moving in VRT, such as teleporting
Interactivity	Reactive and animated aspects
Cinematography	Cinematic elements such as camera angles, camera movement, sceneray and color
Content	Digital assets and inner elements

## Sheet: Feedback
		Gray: Solved issue
		Blue: Potential improvement	can be fixed when there is enough time
		Red: Potential Issue not solved	need to fix
		White: others
User name (Initial)	Feedback date	Feedback category	Feedback comment
A clinical psychologist	2022-09-14	Content	Customizable virtual environemts based on user preference. Change objects on the shelf, furniture...?
		Interactivity	Add some interactions with objects with diffelent levels of mental distance: See an object through a barrier
		Interactivity	Add some interactions with objects with diffelent levels of mental distance: put an object in a box
		Interactivity, Content	Enable users to select defualt object for each typical emotion or thought (e.g. depression and anger)
A psychiatrist	2022-09-16	Locomotion	Sometimes go out of the living room by moving vertically too far
		Interactivity	After leaveing an objet from grabbing, it tilts
		Interactivity	Add a simple game using embodied negative thoughts
T・K	2022-10-02	Content	The current options of shapes seem to be dedicated to psychotherapy, which posed pressure to him
		Interactivity	It was difficult to select the pin for color saturation. Some UI is small.
		Overall	The system was better than he expected and fun to use.
K		Flow - Hierarchy	Add the function to save & load object and shield properties
		Interactivity	Add sound when a user select an option on system and object menu
		Interactivity	Add a button to delete an object on the object menu
		Interactivity	Add a button to delete all objects in the virtual environmnet
		Spaciality	Enable rotating camera horizontally using the controller
Y・C	2022-11-22	Hardware	The head-mounted device is heavy
		Interactivity	Add an option to show a tutorial of how to use the contoller and buttons
		Spaciality	Enable restarting from the starting point
		Spaciality	Enable users to select a starting point among multiple starting points
		Content	Make the object menu face to the user (camera) automatically
		Interactivity	Enable a user to choose where to place an object when it is spawned
		Interactivity	Put delete buttons at a proper place on the object menu: where to put?
		Content	Give understandable names to the tabs on the object menu
		Content	Fix hand position. Sometimes it goes away from the user
K		Flow-Hierarchy	Save and load options of controller tutorial and starting point
		Interactivity	Change to intuitive interaction to rescale and delete objects
		Cinematography	Enable changing the light (add night mode?)
		Content	Adjust the position of system menu when it is shown. Avoid collision with other objects in VE.
	2023-01-12	Spatiality	Adjust the viewpoint rotation at the player start positions
K・T	2023-01-13	Locomotion	Make the vertical movement discrete to avoid simulator sickness
		Spatiality	When rotating the viewpoint, the user goes out of the living room
K	2023-01-18	Spatiality	Viewport rotation does not work. Only hands are rotated
		Spatiality	Teleportation does not jump to the selected location. Z position changes.
L・Y	2023-01-19	Interactivity	After grabbing an object, it is not placed at correct position (z positin is too higher)
		Interactivity	System setting menu is not spawned in front of the user
		Interactivity	Some object shapes get too large when the scale is maximized
K	2023-01-28	Content	Make the object menu separated into some panels rathan tan tab-based one
	2023-01-31	Interactivity	Highlight/Unhighlight property button when pressed
	2023-01-31	Interactivity	Add a button to reset all the object properties
	2023-02-03	Interactivity	Spawn the object menu in front of a pedestal when it is selected
	2023-02-03	Interactivity	Spawn system menu in front of camera when app menu button is clicked
	2023-02-06	Content	Connect object data and the new object menu
	2023-02-06	Flow-Herarchy	Update save function with vars of BP_Pedestal
	2023-02-07	Spaciality	Avoid continuous changes of view rotation
	2023-02-08	Interactivity	Make the object menu movable in case of collision with other object
	2023-02-09	Interactivity	Switch the background color of the selected button (visual and shield properties) in the control panel
	2023-02-09	Content	Fix size of shield and shape objects
	2023-02-10	Content	Fix reset button
	2023-02-11	Content	Fix the position of system setting menu (sometimes not in front of the user)
	2023-02-12	Content	Bar: make it more remarkable, change the color and size, roughness
	2023-02-13	Content	Add text to the value of color wheel
	2023-02-13	Interactivity	Relocate immediately after change the option of start position
	2023-02-17	Interactivity	Add function to show and manipulate text of a self-referential thought
	2023-02-20	Content	Show realistic hand
	2023-02-24	Content	Show virtual hand with arm
	2023-02-28	Content	Implement different hand types
	2023-07-12	Content	Add mood lines as options for shape
	2023-07-12	Content	Add texture from a related study
	2023-07-13	Interactivity	Enable move forward/backward an object when selected
	2023-07-13	Interactivity	Make thought object grabbable
	2023-07-13	Interactivity	Toggle visibility of description text
	2023-07-19	Control	Implement data collection module
	2023-07-21	Control	Deploy data collection module
	2023-07-27	Interactivity	Fix laser on system setting menu
	2023-07-27	Interactivity	Fix grab issue (sometimes cannot release an object)
		Content	Create objects of the participants
		Content	Import objects of the participants
