# Supplementary material
Source: ML conference proceedings conference paper supplement (https://openreview.net/forum?id=3fqqjMM1BI)
Supplement: supplementary_material [file Supplementary_Material_D.xlsx]

## Sheet: シート1
Condition	Date	Name	Q1.1: What object did you imagine to represent your target negative thought?	Q1.2: How is the object related to your negative object in terms of its shape, texture, color and size?	Q2: How well were you able to express (VR group) or imagine (mental-imagery group) the thought on a scale of 1-5?	Q3.1 : How important is each visual property to represent your target negative thought?	Q3.2: How important is each visual property to help you feel separated from your target negative thought?	Q3.3 How much acceptance did you feel when you transport the object?	Q4: Did you encounter any difficulties during the intervention?	Q5: Any other feedback
Mental-imagery	2023-06-28	MI1	- Black spiky ball - Dark green tangible object - A pile of sticky mud like glue	- Based on his experience in the past - Based on the root of the thought with tangling feeling - It represents overwhelming thought, which he cannot get rid of. He imagined a situation where he cannot get out of the bed	3: Imagination was not so vivid because 1. the past thought is not present 2. the tangible feeling of the object is not available (he cannot actually feel it) 3. It was difficult to imagine detailed color and texture.	Shape: 5. The shape is very important because it represents what the object is Texture: 5. It is also important to describe the feeling and the degree of overwhelming sensation Color: 2 It is not so important because it should be close to the one in the real world. The color can be mostly determined and clear nought. Scale: 3. He imagined the actual size of the object in the real world, which is …			- The most significant difficulty is to try to imagine 3 different objects. - The protocol in the experiment is not clear. - It was difficult to concentrate on the tasks. - It was difficult to image in a vivid way	Benefit of mental imagery - He could keep distance toward thoughts - He had similar exercise in the past - Specify object or texture, then manipulate the object - Not only keep distance, but he can calm down He realized this exercise does not "solve" his problem, but helps him to deal with it
Mental-imagery	2023-07-24	MI4	A bad person in a comic who can be represented as his mean project boss or supervisor	He failed a project when he was a UG student due to the lack of knowledge. So his boss was hard on him.	4~5. The comic person was easy to imagine	Shape: 5 very important to represent bad things which he remembers well Texture: 3. Color: 4, important, makes him remember the details in the past experience. Scale: 4.	Scale: he turned the comic person into some small weaker form. Color: he turned the comic person white to represent other weaker enemies like ルイ	The weaker form with white color was more acceptable	Nothing special	The exercise was good to deal with his negative emotion. It was a good experience.
Mental-imagery	2023-07-25	MI5	Black untouchable cloud	Shape: Cloud can be only seen and untouchable that represent a helpless thought Color: Black to represent a negative mood. (He associates white color withhappy mood)	2. It was difficult to imagie the object because he distracted by real objects in the physical room. He could not concentrate on the imagination.	Shape: 4 important. It is important to deterrmine the object Texute: 2 not so important. He did not imagine texture Color: 5 very important. It represents his mood Scale: 3. He did not think too much about scale		He put the imaginary cloud onto some physical objects in the physical room (hang it on the wall). Also, he changed its scale and distance from it	- Since he recently had no negative thought, it was difficult to recall negative thought - Environment is distracting to focus on the exercise. - Difficulty in imagination
Mental-imagery	2023-08-15	MI8	Fishbowl. There is only 1 fish in it.	Shape: Round shape Color: Transparent made of glass Size: The bowl is quirte small in hand Texuture: no texture Position: It is placed near the window. She can see the light coming into the fishbowl	5. very well. It was easy to imagine the object.	Shape: 3. Texture: 1 not important Color: 5 very important, because the object is made of glass Scale: 5 very important	Shape: she changed the shape (only) of the fishbowl	She placed it on a high position like a shelf, and then put it on a chair (very lower). Then, She imagined an apartment room and moved the fishbowl to a room of her roommate to hide the object. High position indicates verwhelming and stressful mental state. At a lower position, she could look it down with less stressful mood. She imagined to ask her roommate to open the door, and put it on her ro…	Nothing special	It was quite easy to follow the instructions. Question: is it OK to hide the negative object?
Mental-imagery	2023-08-15	MI7	Black cube (1 meter)	Shape: no spikes, just a cube Color: Black to represent negative mood	5. Very well	Shape: 5 very important Texture: 1 Color: 5 Scale: 1	She just changed the scale to make it smaller, squeezed. Then, she felt better and the negativity of the thought was decreased	She put it on a table, then on a sofa. Such places worked as a space for the negative thought	No difficulty	She found the exercise helped her to feel better, relaxed, less frighten toward the negative thought
Mental-imagery	2023-08-17	MI6	Many bubbles. Some are huge and others are small	Shape: many bubbles came from far away to in front of her eyes. They made her feel pressured and anxious Texture: transparent	4. Vivid enough. She also imagined she was in a park where childen makde bubbles	Shape: 2. the number of bubbles were more important Texture: 2 Color: 2 Scale: 5. Some are very huge, some are very small	She changed the number of bubbles. First, there were so many bubbles. Then, she combined them into a bigger bubble, ignoring small bubbles. Some disappered. When the number of bubbles increased, she felt more anxious. Then, she overview the whole bubbles and noticed some bubbles disapperad, leading less anxious and negative mood.	She put the bubbles in a transparent box, that helped her accept the negative thought because it (bubbles) no longer bothered her.	It wad difficult to imagine how to transfer (put) the object. How to change the number of bubbles?	It was the first time to do the defusion exercise. It was interesting and helpful for her to deal with the negative thought.
Mental-imagery	2023-08-17	MI9	Many leaves with brown and green color, falled on the ground. When the wind blows, they spread out making chaotic situation. In the autumn, the weather is cold.	Thought: I make mess of everything. Many leaves in different direction represents messy situation. The weather is cold in autumn because he felt sad about the negative thought. The wind strengthens the mess	4. Well. but the real environment did not match his imagination (not cold, the real environment was not meesy)	Shape: 5 Texture: 2 Color: 5 Scale: 5	Number: 4. First, there were only several leaves, but then many leaves appeared Scale: 4. He tried to collect many leaves. So he made them smaller that made him less negative. Color: change green color to brown color He did not change shape and texture. Over all, he felt less negatiev	Since there was a hot bottle in his real environment, he collected the leaves and put them in it to boil the leaves. The leaves emitted refresh emigrant and flavor, tha made him relaxed and less negative. He felt he could accept the negative thought easily.	- He sometimes distracted by the real environment that did not match his imagination. - It was difficult to imagine an object first. he needed to find an object from the real environment. There were leaves around him, so he picked up them.	- The exercise was good. - He wanted some hints or instructions to imagine an object to represent the negative thought. - Some guidance would be helpful.
Mental-imagery	2023-08-28	MI11	A large, hard and dirty stone in a palce with water and a lot of mud	From a video. Dirty one to represent something unwilling to touch and get close to.	5. It was easy to imagine the stone. Well visualized. She even felt the the texture and cold temperature.	Shape: 1 because it can be square, round... Texture: 5 because this is the key element for the representation. She changed the texture a lot Color: 3. It was just the color of the real storn (gray). If it is other color, it represents something else. Scale: 4. If it is not too big, she could lift it up	Texture 5. The most helpful to feel separated from the negative thought. Scale: 4 Color: 1 Shape: 1	She turned a rock into a fake rock that is made of bubble plastic. Then it was smashed because it is plastic. It got more dirty and disgusting, so she put it into a sealed wooden box. It was difficult to collect and put the smashed rock bacause it was messy. She felt less separated from the thought (object), but not sure about the acceptance.	- It was difficult to imagine picking up each piece of rock. She could not collect all of them. - She finished all the tasks in 6,7 minutes and did't know what to do in the remaining time. It would be better to receive instrucionts in a step-by-step manner.	- By the writing task, she organized her negative thought and might feel better.
Mental-imagery	2023-07-14	MI3	Dark crowd over his head. It's going to rain, but not raining now. Storm is coming. He cannot observe natural light. The crowd expanded all over the place, covering the whole sky, making him uncomfortable. It was like a wet blanket covering him.		4. It was easy to imagine the crow because it is something abstract.	Shape: 5. Texture: 5. wetness was important Color: 2 to 5. It was not so important first for the representation step, but was important for maniplation step. Scale: 5. to express the crowd covers the whole place (room).			no	- When he selected the most negative thought, it was important to face himself. - The writing task uisng a pen and paper helped him to face his negative memory. - He could manipulated the object well, because he had a similar mental care before - Other people may have difficulty to do this kind of exercise bcause their negative thought may by too overwhelming and cannot face it. - 10 minutes was …
Mental-imagery	2023-08-26	MI10	1. Many rolled papers. They moved fast and some gradually moved into a basket. Others just piled up. 2. Flies (insect). medium size. one or two flies were flying around her. They always there and keep confusing her. 3. Cat's fur ball. it is not smooth. gray color. not so big. it is always there	1. Many rolled papers because negative thought is tiny, in everywhere and ordinay thing. It can be twined together and get to a bigger problem 2. Files becasuse they always around her 3. Furball because it always around her.	4. like images on Google	Shape: 4 important for furball. But not so important for other objects Texture: 5 very important for furball Color: 3. natural color is good enough. For furball, the gray color represents negative mood. Scale: 4. tiny objects represents not intense negative thought	Furball: she tried to change the color but back to the original color. Paper: First, there was a few paper, but gradually got very messy with more papers. She focused on designing the representation of the negative thought, that destracted from the negative thought, leading the sense of separation. Changing texture and motion were the most helpful to feel separated.	By putting the objects on something, she felt more control over the thought and acceptqance. She realiszed it is fine not to solve the problem. Rolles papers were floating in the air. Then they went into a basket. Flies were just around her. Furball was on the bed	NO	- She could do the exercise even without the instructions. - It would be helpful to deal with negative object by change the number of it.
VR	2023-07-25	VR1	A bumpy potato or meteorite with a spiky part. Metalic and silver color	Shape: Sphere is himself or his heart.The extended part represents his future. The unconnected part shows his unpromising future Bumpy part to represent his hurted heart. Color: Calm and blueish color represents sadness, for cold heart Texture: Metalic texture for coldness	5. Very well	Shape: 4 important to determine the object Texture: 3 Color: 5 very important to represent negaetive mood Scale: 4	Changes in the scale and color helped him to separate the negative thought the most		- The usage of VR system was difficult. It was difficult to remember the functions of each button, partly becasue he does not use a VR device so often. - It was difficult to move slightly by teleportation	- It was fun to do the exercise with the VR system - He felt the immersiveness and could focus on the exercise - VR has more potential than painting as it can represent more - Intuitve to grab and move objects, no problem of the interaction with menu - It would be more fun to move objects (furniture) in the room.
VR	2023-07-27	VR3	Splashes of paint with some colors	Mess of everything. Shape: Splash represents the messy thought without the control over it. Need to clean the splash to go back to normal state. Color: mixed colors to represent mixed complicated thought	5. Very well	Shape: 4 Texture: 1, as the object has plain color Color: 5, when he changed the color to black, he felt very negative and stressful. From black to other colors, the negativeity of the thought was decreased. Scale: 5. when he made it big and close to him, occupying the space, it caused overwhelming mood. When he put it far away, it helpted to feel dstance from the thought. Then hang it on the wal…	Changes in color and scale, and put action were the most helpful to feel separated and control of the thought. He felt the link between the object and his thought. So he could separted the thought from himself.		- It was difficult to move around by teleportation. - View rotation was difficult	- It would be good to allow subjects physically move around in a large physical room for better movement - Grab interaction was natural - Interaction with menu was OK - The VR modality was helpful to do the exercise - Writing tasks helped him to induce the negative thought
VR	2023-07-27	VR2	regular dodecahedron with sand texture	Shape: angular shape for negative thought Color: dark brown color for negative thought	5. Very well	Shape: 3 Textuer: 5 Color: 5 Scale: 2	Color and texture were the most helpful to feel separated from the thoguht. He changes the color from dark to pink He didn't change the shape because a different shape represents a different thought	- By putting the object on a shelf, he could take mental distance from the negative thought too. - However, he was not sure about the acceptance. He thought the negativity of the object and thoguht were different.	No, because he got used to use the VR system	- Compared with mental-imagery, VR was helpful to actually see the changes in visual properties. - VR is more vivid and intuitive. It was easier to represent a negative thought
VR	2023-07-28	VR4	A rusty robot for "I'm failure"	Shape: A robot should be made with cutting-edge technology and be very helpful for people. It represents the most good for people Texture: However, rusted texture means the robot is no longer needed by people.	4. Well What's missing was his voice or messages related with the target thought to make the object more alive	Shape: 5 as it represents what the object is Texture: 5 as it represents some meaning of mental state Color: 2 or 3. Scale: 5	Change in scale was the most helpful to change the negativity and feel separated. Changes in shape, texture and color altered the meaning of the thought. Especially shape means the most So he didn't change the shape, color and texture.	He put the object around the window because he wanted to see it only without other stuffs. He compared the scale of the object with the outside scenery, that made him realize that his negative thought was compratively very small compared with bigger world.	No difficulty as he is familiar with VR device.	- The VR interaction was quite good - He was able to focus on the tasks. Once he started to change the visual properties, he noticed the negativity of his thought decreased a lot.
VR	2023-08-15	VR7	A cliff for "My life is pointless"	Shape: If she falls off from the cliff, she would die, which is pointless. Texture: It was not the same as she expected in VR	4. very well	Shape: 5 very important Texutre:? She wanted to use other textures Color: ? she didn't use the color Scale: 5. by chanigng the scale, she could feel the control over the object.		She put some cliffs around her to feel a sense of helpless. Such sensation was helpful to understand she doesn't need to fight with the negative thought. Changes in the scale was the most helpful to feel separated from the negative thought	Nothing special	- She wanted to do more interactions with the object such as - throw the object away - Arrange some objects. A tangile UI should be convenient to do this. The current system could cause occulusion and troublesome to manullay place an object one by one - Some funciton to turn negative mood to something beautiful - These variety of interactions would be important and helpful for her to feel the con…
VR	2023-08-01	VR6	Tangled wires with gray color	Shape: tangled wires (messy shape) to represent her messy thought Color: gray or black to make the object serious (rather than light color)	4. very well Missing propery like motion (floating), and other interaction (tear it down)	Shape: 5 Scale: 5 Color: 5 Texture: 5 Also, motion was imoprtant to her	Same importance Visual manipulation made her shift her focus from the negative thought. She used her logical thinking to observe it more objectively. With VR sytem, it was easier to describe the thought with concrete visual representation that reduces the cognitive burden. The tasks helped to objectively describe the thought.	She felt the acceptance by putting the object onto some place like a shelf. The object was placed in harmony with other stuffs in the virtual environment. This task was very effective for her and made her feel peaceful.	Manipulation of the object was little bit difficult	- She wanted to tear it down into small pieces. - She wanted to express unsafe mood by floating motion
VR	2023-08-23	VR8	A cube monster with eyes	With the organize appearance like a monster, it expresses his emotion that spreads for itself. Also, by placing the multiple objects, they represent systematic violence	3?	Shape: 4 Scale: 4. Texture: 2 Color: 2 Missing: It is not free to further express the object by himself in VR. He wanted to drawo something in VR	Shape: 4 Texture: 2 Color: 3 Scale: 5 Changes in the visual properties helped him to separate the negative thought. The interactions were enough to make it less scary. But he wanted to make it further less scary.			- The environment is not so important to him. Furnitures are not necessary to him. - The function to create multiple objects is good because it can helps him to express that his negative thoughts are everywhere - Low freedom to control himself. The teleportation was difficult. He sometimes stucked under the table. - More flexible interaction using natural language would be convenient.
VR	2023-08-24	VR9	A man burying his head in his hands with bleeding heart	Shape: It is the representation of herself. The broken hear represents her mind Color: Black and blue represents upset and sadness. Texture: It represents wound of her mind Scale: Initially the same size of herself.	5. Very well. The object can be regarded as herself.	Shape: 5 as it represents herself well. Human shape is important Color: 5. Bright color indicates happy mood, while dark color represents negative mood. Texture: 4. She wanted to choose a texture with dark (not beautiful ) skin, but there wasn't such one. Scale: 4. not so sure.	Changes in color, texture and scale made her feel better. Color: initially bule then red to represent happy mood. Scale: She made it smaller to gain more control over the thought. It could be in her hand. She thought she had the power to give something to her (the object) like God gives fortune to smaller ones. She became more confidnet to deal with the negative thought. After the observation, sh…	Since she regarded the objects as herself, she put the object on a low table, and then sofa to make it comfortable. Then, she felt more secure and relaxed. But not sure about the acceptance.	- The object menu was sometimes not positioned property. It was sometimes at a too low position, colliding with other objects. - The outside scenary could be more realistic	- She wanted to sit on the sofa as if it were real one. - When touching an object, she wanted to stand up and stay on the side of the object, that would make it more immersive and realistic. - The virtual living room was cozy and comfortable with a sense of security. - The experience was amazong and cool. - In the virtual environmnet, it was flexible to change visual properties of the object. Thi…
VR	2023-08-25	VR10	A cube with wrinkled texture	Shape: not so sure Texturel: The wrinkled texture indicates something untouchable, not beaultiful and twisted stuffs Color: Dark color to represent a negative and upset mood. Size: Relatively big and takes much space	4. Well But it was hard to precisely express the thought as object using her mental-imagery first.	Shape: 2 not so important Texture: 4 important Color: 5 very important Scale: 1 not so important	Shape: 4. changes in shape helped her to feel separated from the negative thought Texture: 4 same as shape Color: She turned it from dark to white and warm color (pink) that made her feel separated and more acceptance Slace: She made it smaller because she wanted to minimize the existence of the negative object.	She put the object on a shelf near the window because she liked sunshine coming through the window. The sunshine seemed to make the negative object something poisitve.	- She wanted to walk around in the physical space to move around in VR - SHe wanted to do more interaction with objects for more diverse operations e.g.) have a dialog, show written content...	- The experience was great because it actually helped her to separate the negative thought. - The virtual environemnt was good. The deisgn of VE was nice. - More diverse inteior and outside environemnt was preferred by customization. She preferered more warmer color in VE. - Long-term effectiveness should be also measured. - Some negative thoughts are consistent all time. Such thoughts my influen…
VR	2023-08-28	VR11	A double-sized bed	"My life is pointless" Shape: In most of time she stays on a bed to think about negative stuffs Texture: soft texture because she wants to stay in a soft and comfortable bed Color: White to represent something pointless and empty Size: the same size of a big bed	5. Very well	Shape: 4 important Texture: 2 Color: 4. White color is important. Other colors are not suitable Scale: 2	Changing visual properties made her shift the focus on the tasks from the negative thought	She put the bed in front of sofa. This task helped her to accept the negative thought.	- Sometimes she accidentally pressed wrong buttons

## Sheet: シート2
	Mental-imagery	VR			Mental-imagery	VR
Q2	3	5		Q3.1: shape	5	4
	5	5			5	4
	2	5			4	3
	5	4			3	5
	5	4			5	5
	4	4			2	5
	4	3			5	4
	5	5			1	5
	4	4			5	2
	4	5			4	4
average	4.1	4.4		average	3.9	4.1	All	4
sd	0.994429	0.699206		sd	1.44914	0.994429		1.21395
All
average	4.25			Q3.1: color	2	5
sd	0.810497				4	5
					5	5
					5	3
					5	3
					2	5
					5	2
					3	5
					2	5
					3	4
				average	3.6	4.2	All	3.9
				sd	1.3499	1.13529		1.25237
				Q3.1: texture	5	3
					3	1
					2	5
					1	5
					1	3
					2	5
					2	2
					5	4
					5	4
					5	2
				average	3.1	3.4	All	3.25
				sd	1.72884	1.42984		1.55174
				Q3.1: scale	3	4
					4	5
					3	2
					5	5
					1	5
					5	5
					5	4
					4	4
					5	1
					4	2
				average	3.9	3.7	All	3.8
				sd	1.28668	1.49443		1.36111
